# Supplementary material
Source: PubMed Central journal article supplement (PMC6484133)
Supplement: supp_RA118.006876_142195_2_supp_286940_pmz0jm.pdf [file supp_RA118.006876_142195_2_supp_286940_pmz0jm.pdf]

## Supporting Information

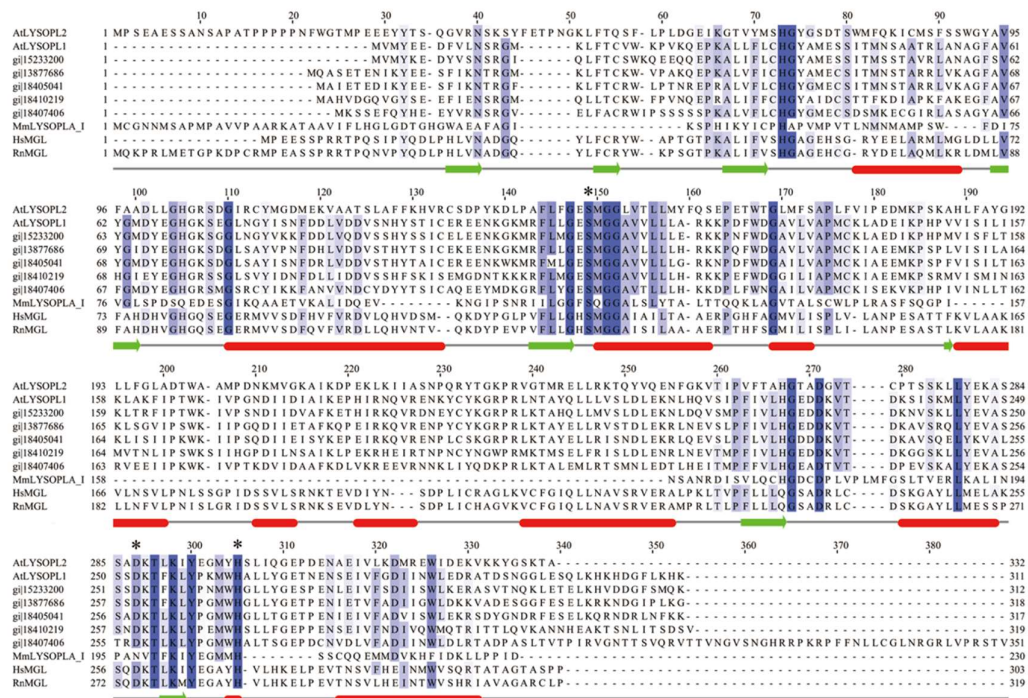

**Figure S-1. Structure-based alignment using software Jalview version 1.6.** Structure-based alignment of AtLYSOPL2, AtLYSOPL1, AtLYSOPL1-like proteins (gi15233200, gi13877686, gi18405041, gi18410219, gi18407406), *M. musculus* LysoPLA I, *H. sapiens* MGL, and *R. norvegicus* MGL. Identical amino acid residues are marked in dark blue, homologous residues in light blue, and gaps as dashes; α-helices (red lines) and β-strands (green lines) are indicated below the sequences. The conserved catalytic residues (Ser-147, Asp-268 and His-298) are marked with asterisks.

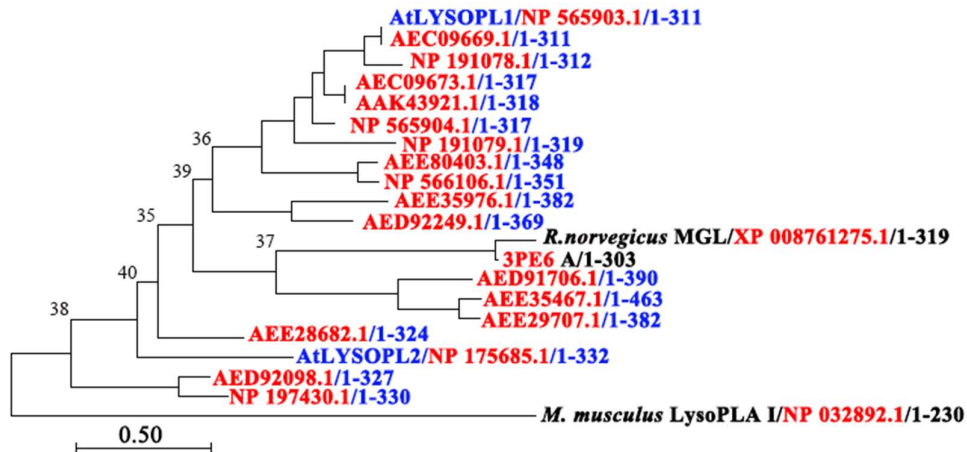

**Figure S-2. Molecular phylogenetic analysis of LysoPL homologues.** AtLYSOPL2, AtLYSOPL1, AtLYSOPL1-like proteins, *M. musculus* LysoPLA I, *H. sapiens* MGL, *R. norvegicus* MGL and *Arabidopsis* monoacylglycerol lipases (MAGL) were analyzed by the Maximum Likelihood method. The protein accession numbers are as follow: AtLYSOPL2 (NP\_175685.1), AtLYSOPL1 (NP\_565903.1), AtLYSOPL1-like proteins (NP\_191078.1, AAK43921.1, NP\_565904.1, NP\_191079.1 and NP\_566106.1), *M. musculus* LysoPLA I (NP\_032892.1), *H. sapiens* MGL (3PE6\_A), *R. norvegicus* MGL (XP\_008761275.1) and *Arabidopsis* MAGL (AEE28682.1, AEE29707.1, AEE35467.1, AEE35976.1, AEC09669.1, NP\_565904.1, AEC09673.1, NP\_566106.1, NP\_191078.1, NP\_191079.1, AEE80403.1, AED91706.1, AED92098, AED92249.1 and NP\_197430.1). Bootstrap values (> 35%) are recorded at the nodes. *Arabidopsis* proteins are denoted in blue, and protein accession numbers in red.

#### Reference

Jones, D. T., Taylor, W.R., and Thornton, J.M. (1992) The rapid generation of mutation data matrices from protein sequences. *Comput. Appl. Biosci.* **8**, 275-82

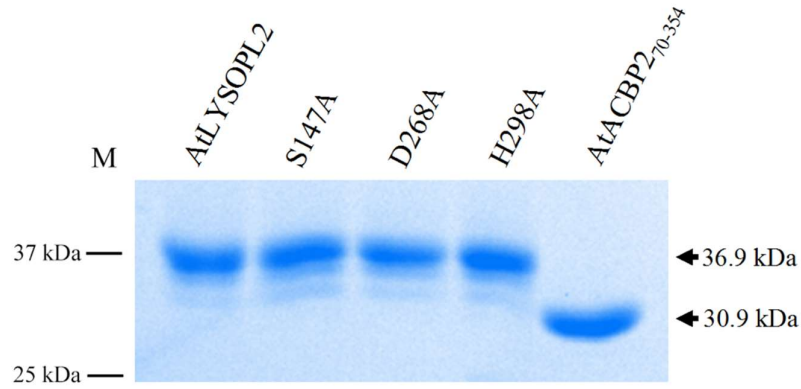

**Figure S-3. SDS-polyacrylamide gel electrophoresis of the purified AtLYSOPL2 (wild type), AtLYSOPL2 mutant proteins (S147A, D268A, H298A) and AtACBP2<sub>70-354</sub>.** Eluted fractions of AtLYSOPL2 (wild type), AtLYSOPL2 (S147A), AtLYSOPL2 (D268A), AtLYSOPL2 (H298A) and AtACBP2<sub>70-354</sub> were collected. Arrows indicate homogeneity of the purified proteins. The predicted molecular weights of AtLYSOPL2 and AtACBP2<sub>70-354</sub> protein are 36.9 kDa and 30.9 kDa, respectively. M, protein marker.

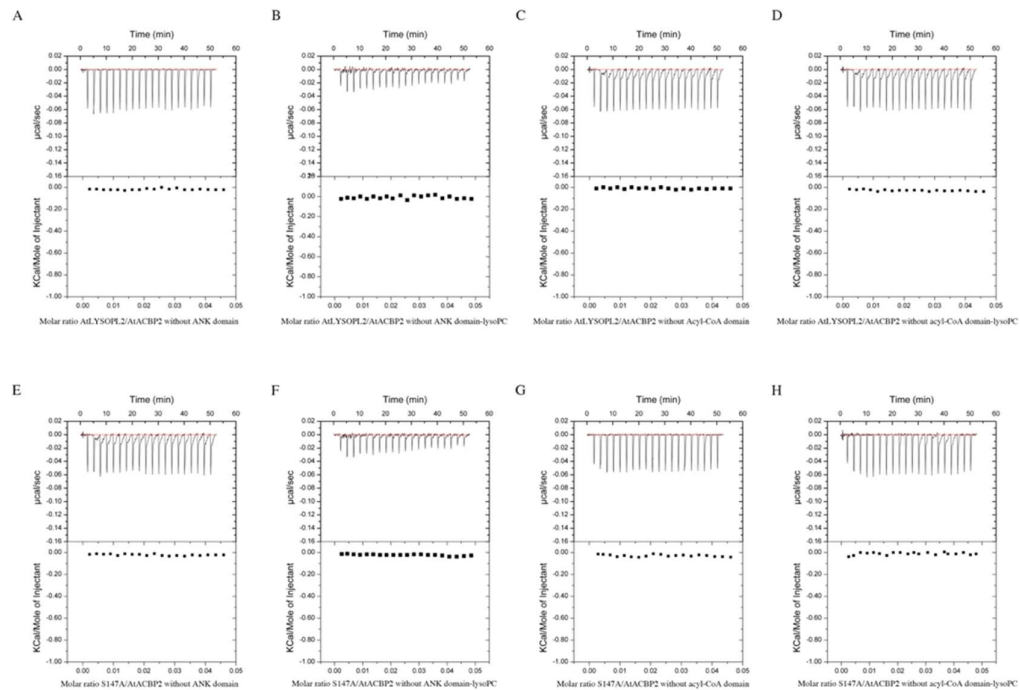

**Figure S-4. ITC analysis of interactions of AtLYSOPL2 wild-type or its mutant (S147A) with AtACBP2<sub>70-214</sub> or AtACBP2<sub>215-354</sub> with/without lysoPC.** (A-B) Wild-type AtLYSOPL2 with AtACBP2<sub>70-214</sub> alone (A) or complexed with lysoPC (B). AtACBP2<sub>70-214</sub> consists of the ACB domain lacking ankyrin repeats. (C-D) Wild-type AtLYSOPL2 with AtACBP2<sub>215-354</sub> alone (C) or complexed with lysoPC (D). (E-F) AtLYSOPL2 mutant (S147A) with AtACBP2<sub>70-214</sub> (E) or complexed with lysoPC (F). (G-H) AtLYSOPL2 mutant (S147A) with AtACBP2<sub>215-354</sub> alone (G) or complexed with lysoPC (H). AtACBP2<sub>215-354</sub> consists of the ANK domain lacking the ACB domain. Interactions were measured by titrating 20-30  $\mu$ M AtLYSOPL2 wild-type or mutant proteins in the chamber with 300-400  $\mu$ M AtACBP2 in the syringe. The values originate from Table 3.

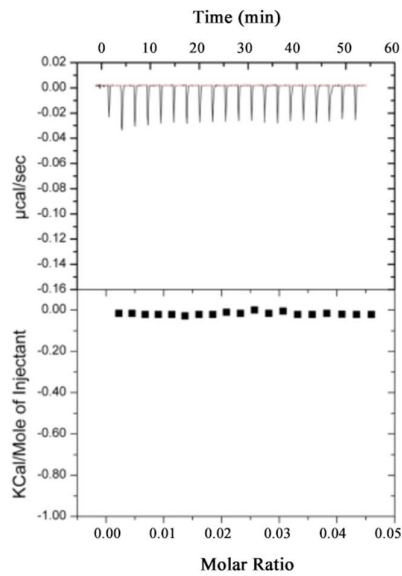

**Figure S-5. ITC analysis of AtLYSOPL2 wild-type protein binding to lysoPC.** ITC analysis of wild-type AtLYSOPL2 interactions with lysoPC. Interaction was measured by titrating 20-30  $\mu\text{M}$  AtLYSOPL2 wild-type protein in the chamber with 600-800  $\mu\text{M}$  lysoPC in the syringe. The values originate from Table 4.

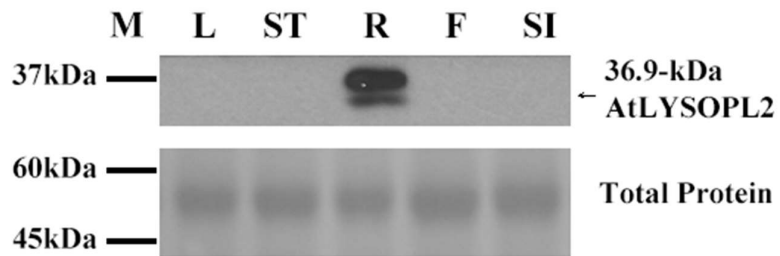

**Figure S-6. Western blot analysis of AtLYSOPL2 expression in various tissues of *Arabidopsis*.** Total proteins were extracted from leaves (L), stalks (ST), roots (R), flowers (F) and siliques (SI) of 5-week-old *Arabidopsis* and cross-reacted with anti-peptide antibodies against AtLYSOPL2. Bottom, gel stained with Coomassie Blue showing equal loading of protein amount in each lane. M, protein marker.

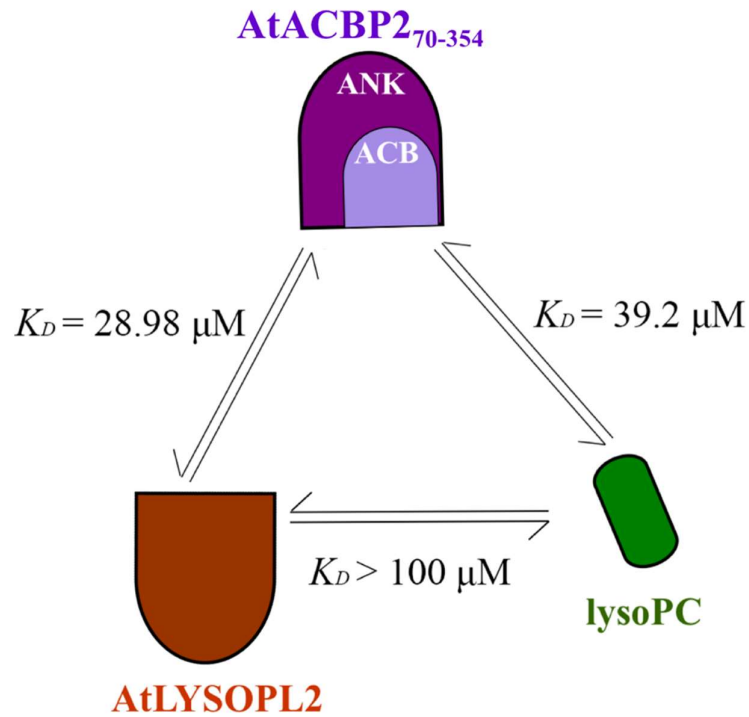

**Figure S-7. Pictorial representation of the interactions between AtACBP2<sub>70-354</sub>, AtLYSOPL2 and lysoPC.** AtACBP2<sub>70-354</sub> binds to AtLYSOPL2 and lysoPC. LysoPC, green; ANK domain, purple; ACB domain, light purple; AtLYSOPL2, brown. The  $K_D$  values of AtACBP2<sub>70-354</sub> with AtLYSOPL2 and lysoPC were 28.98  $\mu\text{M}$  and 39.2  $\mu\text{M}$ , respectively. These values are displayed in Table 1, Table 2, Fig. 1 and Fig. 2. In comparison, the average  $K_D$  values for AtLYSOPL2 mutant proteins and lysoPC interaction were larger than 100  $\mu\text{M}$ . These values are displayed in Table 4 and Fig. 6.

**Table S-1.** Primers used in this study.

| Description                                                                   | Name<br>(Orientation) | Sequences (5' to 3')                                       |
|-------------------------------------------------------------------------------|-----------------------|------------------------------------------------------------|
| Primer pair to amplify the coding region of <i>AtLYSOPL2</i>                  | ML2040<br>(forward)   | AAACCC <b>TGCAG</b> CATGCCGTCGGAAGC<br>( <i>Pst</i> I)     |
|                                                                               | ML2041<br>(reverse)   | AGTCCAT <b>GGT</b> CAAGCGGTTTTAGATCC<br>( <i>Nco</i> I)    |
| Overlapping primer pair to introduce S1147A mutation                          | ML2298<br>(forward)   | CCCAT <u>CGCT</u> TCACCAA                                  |
|                                                                               | ML2299<br>(reverse)   | TTGGTGAAG <u>CGAT</u> GGG                                  |
| Overlapping primer pair to introduce D268A mutation                           | ML2030<br>(forward)   | CTCCAGCA <u>ATC</u> GCTGTC                                 |
|                                                                               | ML2031<br>(reverse)   | GACAGCGG <u>ATG</u> CTGGAG                                 |
| Overlapping primer pair to introduce H298A mutation                           | ML2032<br>(forward)   | CAGCGA <u>GGC</u> ATACATCC                                 |
|                                                                               | ML2033<br>(reverse)   | GGATGTAT <u>GCCT</u> CGCTG                                 |
| Primer pair to amplify the coding region of <i>AtACBP2</i>                    | ML2037<br>(forward)   | AAACCGG <b>TGGAGCGG</b> ATTCGCTTGTG<br>( <i>Age</i> I)     |
|                                                                               | ML2039<br>(reverse)   | AGTAAG <b>CTTTT</b> AGTCTGCCTGCTTTG<br>( <i>Hind</i> III)  |
| Primer pair to amplify the coding region of <i>AtACBP2</i> <sub>70-214</sub>  | ML3039<br>(forward)   | AAACCGG <b>ATCCGCGG</b> ATTCGCTTGTG<br>( <i>Bam</i> HI)    |
|                                                                               | ML3040<br>(reverse)   | AGTAAG <b>CTTTT</b> AGGTTCCCTTTGAGTT<br>( <i>Hind</i> III) |
| Primer pair to amplify the coding region of <i>AtACBP2</i> <sub>215-354</sub> | ML3078<br>(forward)   | ATATGA <b>ATTCGG</b> ACCAGTTTTTAGCTC<br>( <i>Eco</i> RI)   |
|                                                                               | ML2039<br>(reverse)   | AGTAAG <b>CTTTT</b> AGTCTGCCTGCTTTG<br>( <i>Hind</i> III)  |
| Primers used to screen cloned plasmids                                        | T7 (forward)          | TAATACGACTCACTATAGGG                                       |

Restriction endonuclease sties (bracketed after each sequence) are bolded. Codons for the substituted amino acids are underlined with the altered nucleotides shown in italics.
